# Supplementary material for: Effects of amniotic fluid on human keratinocyte gene expression: Implications for wound healing
Source: PubMed Central journal article supplement (PMC9305168; doi:10.1111/exd.14515), 2022-01-15

**S1**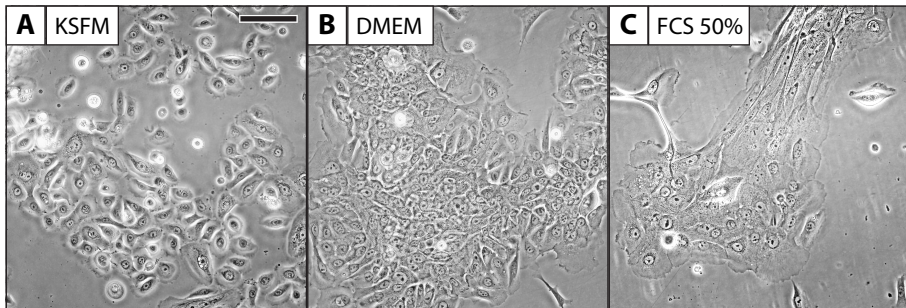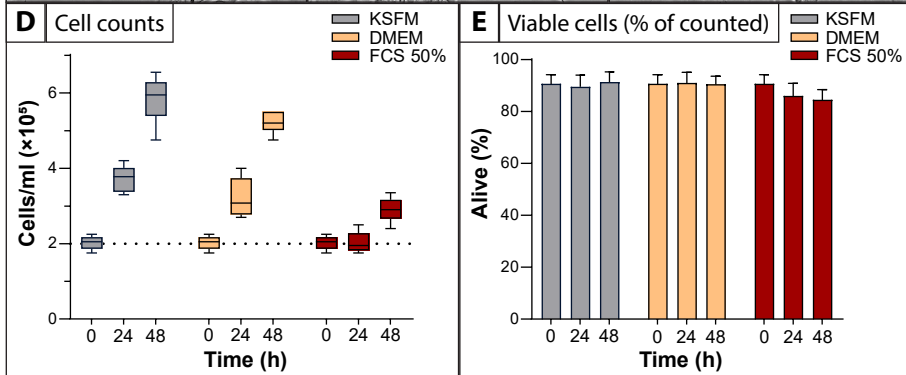

Supplement: EXD-31-764-s002.pdf [file EXD-31-764-s002.pdf]
